# Supplementary material for: Synthesis of end-functionalized glycopolymers containing α(2,8) disialic acids via π-allyl nickel catalyzed coordinating polymerization and their interaction with Siglec-7
Source: Royal Society of Chemistry journal article supplement (doi:10.1039/c6cc07115e), 2016-12-07

## Experimental Section

### General Techniques

NMR spectra were recorded on a JEOL Model ECP-400 (400 MHz for  $^1\text{H}$ , 100 MHz for  $^{13}\text{C}$ ) instrument in the indicated solvent. Chemical shifts are reported in units per million (ppm) relative to the signal for internal tetramethylsilane ( $\delta$  0 ppm for  $^1\text{H}$ ) for solutions in  $\text{CDCl}_3$ . NMR spectral data are reported as follows: chloroform- $d$  (7.26 ppm for  $^1\text{H}$ ),  $\text{D}_2\text{O}$  (HOD (4.8654 ppm at 285 K, 4.7015 ppm at 303 K, 4.6201 ppm at 311 K, 4.3560 ppm at 339 K as internal standard using 3-(trimethylsilyl)-1-propanesulfonic acid sodium salt as external standard)) or  $(\text{CD}_3)_2\text{CO}$  (215.9 ppm for  $^{13}\text{C}$ ) as internal standard for  $\text{D}_2\text{O}$ . Multiplicities are reported by using the following abbreviations: s, singlet; d, doublet; t, triplet; dd, doublet of doublets; dt, doublet of triplets; sep, septet; m, multiplet; br, broad; and  $J$ , coupling constants in Hertz. IR spectra were recorded on a Perkin Elmer Spectrum One FT-IR spectrophotometer. Only the strongest and/or structurally important absorption is reported as the IR data in  $\text{cm}^{-1}$ . All reactions were monitored by thin-layer chromatography carried out on 0.2 mm E. Merck silica gel plates (60F-254) with UV light, visualized by p-anisaldehyde solution, ceric sulfate or 0.5% ninhydrin n-butanol solution. Merck silica gel 60 (0.063 – 0.200 mm) was used for column chromatography. ESI TOF Mass spectra were measured with Waters LCT Premier<sup>TM</sup> XE. HRMS (ESI-TOF) were calibrated with leucine enkephalin (SIGMA) as an internal standard. Gel permeation chromatography (GPC) for quantitative analysis were performed on a Japan Analytical Industry Model LC 605 (recycling preparative HPLC), with a Japan Analytical Industry Model RI-5 refractive index detector and a Japan Analytical Industry Model 310 ultra violet detector with polystyrene gel column (JAIGEL- 1H, 20mm x 600mm) using chloroform as a solvent (3.5mL/min). Dry THF, dry  $\text{CH}_2\text{Cl}_2$ , dry MeCN, and dry toluene were obtained using a GlassContour solvent purification system.

**Methyl (8-azido-octyl 5-amino-5-*N*,4-*O*-carbonyl-3,5-dideoxy-8-*O*-(methyl 5-amino-9-*O*-benzyl-5-*N*,4-*O*-carbonyl-3,5-dideoxy-7,8-*O*-isopropylidene-D-glycero- $\alpha$ -D-galacto-2-nonulopyranosylonate)-D-glycero- $\alpha$ -D-galacto-2-nonulopyranosid)onate (8)**

A mixture of methyl (phenyl 5-amino-9-*O*-benzyl-5-*N*,4-*O*-carbonyl-7,8-*O*-isopropylidene-3,5-dideoxy-2-thio-D-glycero- $\beta$ -D-galacto-2-nonulopyranosid)onate (**8**) (210 mg, 0.396 mmol,) and methyl (8-azido-octyl 5-amino-9-*O*-benzyl-5-*N*,4-*O*-carbonyl-3,5-dideoxy-D-glycero- $\alpha$ -D-galacto-2-nonulopyranosid)onate (**7**) (109 mg, 0.198 mmol), and pulverized activated MS-3A (200 mg) in dry CH<sub>2</sub>Cl<sub>2</sub> (4.00 mL) was stirred at room temperature for 30 min under argon to remove a trace amount of water. Then the reaction mixture was cooled to -78 °C. *N*-iodosuccinimide (93.7 mg, 0.416 mmol) and a catalytic amount of trifluoromethanesulfonic acid (3.50 mL, 0.0397 mmol) was added to reaction mixture at -78 °C. After being stirred for 1.5 h with being allowed to -60 °C, the reaction mixture was neutralized with triethylamine and filtered through a pad of Celite. The filtrate mixture was poured into a mixture of saturated aq. NaHCO<sub>3</sub> and saturated aq. Na<sub>2</sub>S<sub>2</sub>O<sub>3</sub> with cooling. The aqueous layer was extracted with two portions of ethyl acetate. The combined extract was washed with saturated aq. NaHCO<sub>3</sub> and saturated aq. Na<sub>2</sub>S<sub>2</sub>O<sub>3</sub> and brine, dried over MgSO<sub>4</sub>, filtered, and evaporated *in vacuo*. The residue was chromatographed on silica gel with 98:2 chloroform-methanol and further purified by gel permeation chromatography (GPC) to give **8** (163 mg, 0.168 mmol, 84%,  $\alpha$  only). The  $\alpha/\beta$  ratios were determined by <sup>1</sup>H NMR analysis.

$[\alpha]_D^{23}$  -43.7 (c 1.42, CHCl<sub>3</sub>); <sup>1</sup>H NMR (400 MHz, CDCl<sub>3</sub>)  $\delta$  7.28-7.35 (m, 10H, aromatic), 5.53 (br-s, 1H, *NH*), 5.36 (br-s, 1H, *NH*), 4.65 (d, 1H, Bn, *J* = 12.1 Hz), 4.60 (d, 1H, Bn, *J* = 12.1 Hz), 4.46-4.53 (m, 3H), 4.16-4.20 (m, 1H), 4.11 (dd, 1H, *J* = 2.4, 6.8 Hz), 3.94-4.04 (m, 3H), 3.79-3.94 (m, 9H), 3.77 (s, 3H), 3.65 (m, 1H), 3.57 (dd, 1H, *J* = 10.6, 11.1 Hz), 3.49 (dd, 1H, *J* = 10.1, 10.6 Hz), 3.19-3.26 (m, 4H), 3.03 (d, 1H, *J* = 6.3 Hz), 2.96 (dd, 1H, *J* = 3.4, 12.1 Hz), 2.91 (dd, 1H, *J* = 3.9, 12.1 Hz), 2.19 (dd, 1H, *J* = 12.1, 12.6 Hz), 2.02 (dd, 1H, *J* = 12.1, 12.6 Hz), 1.38 (s 3H), 1.63 (s 3H), 1.55-1.60 (m, 4H), 1.29 (m, 8H); <sup>13</sup>C NMR (100 MHz, CDCl<sub>3</sub>)  $\delta$  168.7, 168.0, 159.8, 159.8, 137.9, 137.6, 128.6, 128.5, 128.0, 127.8, 127.7, 109.3, (101.8, 100.3, anomeric), 76.6, 76.3, 76.0, 75.4, 75.2, 73.6, 73.6, 7.09, 70.4, 68.5, 65.1, 58.4, 58.2, 53.6, 52.8, 51.5, 37.4, 29.6, 29.3, 29.1, 28.8, 26.8, 26.7, 25.9, 24.9; IR (KBr) 3302, 2937, 2097, 1771, 1371, 1146, 1086, 754 (cm<sup>-1</sup>); HRMS (ESI-TOF) Calcd for C<sub>47</sub>H<sub>64</sub>N<sub>5</sub>O<sub>17</sub> [M+H]<sup>+</sup> 970.4297, found 970.4298.

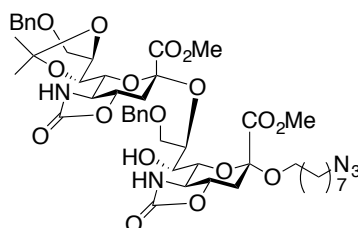

**Methyl (8-azido-octyl 5-amino-5-*N*,4-*O*-carbonyl-3,5-dideoxy-8-*O*-(methyl 5-amino-9-*O*-benzyl-5-*N*,4-*O*-carbonyl-3,5-dideoxy- $\alpha$ -D-glycero- $\alpha$ -D-galacto-2-nonulopyranosylonate)-D-glycero- $\alpha$ -D-galacto-2-nonulopyranosid)onate (9)**

To a stirred solution **8** (70.4 mg, 0.0726 mmol) in THF (725 mL) and H<sub>2</sub>O (150 mL) was added trifluoroacetic acid (580 mL) at room temperature. After being stirred at 40 °C for 1.5 h, the reaction mixture was poured into saturated aq. NaHCO<sub>3</sub> with cooling. The aqueous layer was extracted with two portions of ethyl acetate. The combined extract was washed with saturated aq. NaHCO<sub>3</sub>, and brine, dried over MgSO<sub>4</sub>, filtered, and concentrated *in vacuo*. The residue was chromatographed on silica gel with 97:3 chloroform-methanol to give **9** (42.8 mg, 0.0462 mmol, 64%).

<sup>1</sup>H NMR (400 MHz, CDCl<sub>3</sub>)  $\delta$  7.27-7.34 (m, 10H), 6.13 (br-s, 1H), 5.92 (br-s, 1H), 4.56 (s, 2H), 4.51 (s, 2H), 4.30-4.31 (m, 1H), 3.94-4.05 (m, 3H), 3.59-3.90 (m, 16H), 3.53 (dd, 1H, *J* = 9.2, 10.6 Hz), 3.48 (dd, 1H, *J* = 9.2, 9.7 Hz), 3.42 (d, 1H, *J* = 4.8 Hz), 3.19-3.26 (m, 4H), 2.96 (dd, 1H, *J* = 3.4, 12.1 Hz), 2.89 (dd, 1H, *J* = 3.9, 12.1 Hz), 2.21 (dd, 1H, *J* = 12.1, 12.6 Hz), 2.03 (dd, 1H, *J* = 12.1 Hz, 12.6 Hz), 1.50-1.61 (m, 4H), 1.23-1.34 (m, 8H); <sup>13</sup>C NMR (100 MHz, CDCl<sub>3</sub>)  $\delta$  168.8, 168.6, 160.5, 160.2, 137.8, 137.6, 128.6, 128.0, 127.9, 127.8, 127.8, (100.5, 100.4, anomeric) 77.9, 77.8, 77.7, 76.2, 73.7, 71.9, 71.7, 71.4, 71.2, 70.2, 69.9, 65.3, 58.7, 57.5, 53.7, 53.6, 53.0, 51.5, 37.4, 29.8, 29.6, 29.5, 29.5, 29.4, 29.3, 29.1, 28.9, 26.7, 26.1, 26.1, 25.9; IR (KBr) 3398, 2930, 2097, 1749, 1366, 1074, 737 (cm<sup>-1</sup>); HRMS (ESI-TOF) Calcd for C<sub>44</sub>H<sub>60</sub>N<sub>5</sub>O<sub>17</sub> [M+H]<sup>+</sup> 930.3984, found 930.3991.

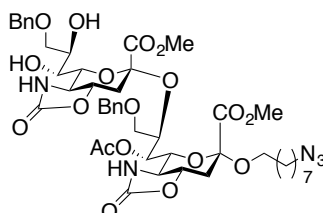

**8-amino-octyl 5-acetamido-8-*O*-(5-acetamido-3,5-dideoxy-D-glycero- $\alpha$ -D-galacto-2-nonulopyranosylonic acid)-3,5-dideoxy-D-glycero- $\alpha$ -D-galacto-2-nonulopyranosylonic acid (11)**

To a stirred solution of **9** (21.7 mg, 0.0234 mmol) in 1,4-dioxane (1.00 mL) and H<sub>2</sub>O (1.00 mL) was added LiOH·H<sub>2</sub>O (30.0 mg) at room temperature. After being stirred at 80 °C for 40 h, the reaction mixture was evaporated *in vacuo*. The residue was purified by reverse-phase column chromatography (Bond Elut-C18). The residue was used for the next reaction. To a stirred solution of above residue in H<sub>2</sub>O (2.00 mL) was added NaHCO<sub>3</sub> (50.0 mg) acetic anhydride (20.0 mL) at room temperature. After being stirred at the same temperature for 1 h, the reaction mixture was evaporated *in vacuo*. The residue was used for the next reaction without further purification. To a stirred solution of the residue in methanol (2.00 mL) was added NaOMe (20.0 mg) at room temperature. After being stirred at the same temperature for 1 h, the reaction mixture was evaporated *in vacuo*. The residue was purified by reverse-phase column chromatography (Bond Elut-C18). The residue was used for the next reaction. To a stirred solution of above residue in methanol (1.00 mL) and H<sub>2</sub>O (1.00 mL) was added

Pd(OH)<sub>2</sub> (40.0 mg). The reaction mixture was hydrogenolyzed for 3 h under H<sub>2</sub> gas atmosphere. The reaction mixture was filtered, and the filtrate was evaporated *in vacuo*. The residue was purified by reverse-phase column chromatography (Bond Elut-C18) to **11** (12.1 mg, 0.0166 mmol, 4 steps 71%).

$[\alpha]_D^{26} +9.31$  (c 1.41, H<sub>2</sub>O); <sup>1</sup>H NMR (400 MHz, D<sub>2</sub>O)  $\delta$  4.09-4.17 (m, 2H), 3.49-3.70 (m, 13H), 3.40 (dt, 1H,  $J = 6.8, 9.2$  Hz), 2.97 (t, 2H,  $J = 7.7$  Hz), 2.74 (dd, 1H,  $J = 4.8, 12.6$  Hz), 2.62 (dd, 1H,  $J = 4.3, 12.6$  Hz), 2.01 (s, H), 2.04 (s, H), 1.71 (dd, 1H,  $J = 12.6, 12.1$  Hz), 1.51-1.65 (m, 5H), 1.31 (m, 8H); <sup>13</sup>C NMR (100 MHz, D<sub>2</sub>O, Acetone-d<sub>6</sub>)  $\delta$  175.7, 175.7, 174.1, 174.1, (102.0, 101.2, anomeric), 79.5, 74.9, 73.6, 73.5, 72.5, 70.5, 69.2, 68.7, 65.6, 63.6, 63.5, 62.5, 62.5, 53.3, 52.7, 52.7, 41.4, 40.3, 29.5, 28.7, 27.4, 26.1, 25.7, 23.1, 22.9; IR (KBr) 3436, 2930, 1603, 1437, 1038, 667 (cm<sup>-1</sup>); HRMS (ESI-TOF) Calcd for C<sub>30</sub>H<sub>54</sub>N<sub>3</sub>O<sub>17</sub> [M+H]<sup>+</sup> 728.3453, found 728.3455.

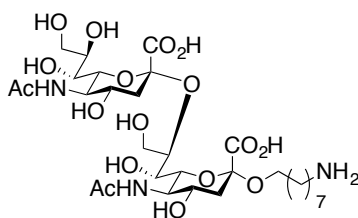

***N*-5,6-heptadienylcarbonylaminoethyl 5-acetamido-8-*O*-(5-acetamido-3,5-dideoxy-*D*-glycero- $\alpha$ -*D*-galacto-2-nonulopyranosylonic acid)-3,5-dideoxy-*D*-glycero- $\alpha$ -*D*-galacto-2-nonulopyranosylonic acid (**3-12**)**

To a stirred solution of 8-aminoethyl 5-acetamido-8-*O*-(5-acetamido-3,5-dideoxy-*D*-glycero- $\alpha$ -*D*-galacto-2-nonulopyranosylonic acid)-3,5-dideoxy-*D*-glycero- $\alpha$ -*D*-galacto-2-nonulopyranosylonic acid (**3-10**) (5.73 mg, 7.58  $\mu$ mol, 1.00 eq.) in H<sub>2</sub>O (500  $\mu$ L) was added 2,5-dioxo pyrrolidin-1-yl 5,6-heptadienoate (**3-11**) (3.38 mg, 15.2  $\mu$ mol, 2.00 eq.) in 1,4-dioxane (500  $\mu$ L) at room temperature. After being stirred at the same temperature for 17 h, the reaction mixture was evaporated *in vacuo*. The residue was purified by reverse-phase column chromatography (Bond Elut-C18) to give *N*-5,6-heptadienylcarbonylaminoethyl 5-acetamido-8-*O*-(5-acetamido-3,5-dideoxy-*D*-glycero- $\alpha$ -*D*-galacto-2-nonulopyranosylonic acid)-3,5-dideoxy-*D*-glycero- $\alpha$ -*D*-galacto-2-nonulopyranosylonic acid (**3-12**) (5.00mg, 5.98  $\mu$ mol, 79%).

$[\alpha]_D^{21} +0.206$  (c 0.225, MeOH); <sup>1</sup>H NMR (400 MHz, D<sub>2</sub>O)  $\delta$  5.12 (tt, 1H,  $J = 6.6$  Hz), 4.69 (dt, 2H,  $J = 6.6$  Hz), 4.09-4.16 (m, 2H), 3.53-3.88 (m, 13H), 3.38 (dt, 1H,  $J = 7.2, 8.7$  Hz), 3.07 (m, 2H), 3.12 (m, 2H), 2.73 (dd, 1H,  $J = 4.4, 12.1$  Hz), 2.60 (dd, 1H,  $J_{3eq,4} = 4.4, 12.1$  Hz), 2.23 (m, 2H), 1.99 (s, 6H), 2.02 (s, 6H), 1.84-1.92 (m, 2H), 1.71 (t, 1H,  $J = 12.1$  Hz), 1.50-1.58 (m, 3H), 1.10-1.26 (m, 10H); <sup>13</sup>C NMR (100 MHz, D<sub>2</sub>O)  $\delta$  215.5, 208.4, 176.0, 175.1, 175.1, 173.4, 101.4, 100.6, 89.4, 78.7, 75.2, 774.2, 72.8, 71.8, 70.0, 68.5, 68.4, 68.0, 65.2, 62.8, 61.8, 52.6, 52.0, 40.6, 39.5, 35.3, 29.2, 28.9, 28.7, 28.6, 28.6, 27.2, 26.3, 25.5, 25.4, 25.0, 22.6, 22.5, 22.3; HRMS (ESI-TOF) Calcd. for C<sub>37</sub>H<sub>62</sub>N<sub>3</sub>O<sub>18</sub> [M+H]<sup>+</sup> 836.4028, found 836.3994.



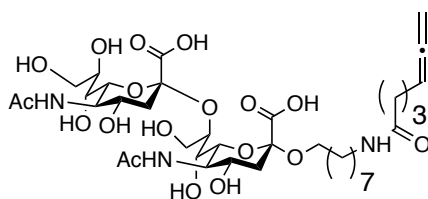

### diSia-Bn ester monomer 16

To a stirred solution of **5** (137 mg, 0.164 mmol) in DMF (1.64 mL) was added BnBr (58.5  $\mu$ L, 0.492 mmol),  $\text{Cs}_2\text{CO}_3$  (214 mg, 0.656 mmol) and a catalytic amount of TBAI at room temperature. After being stirred at 60  $^\circ\text{C}$  for 24 h, the reaction mixture was evaporated *in vacuo*. The residue was purified by column chromatography on silica gel with 90:10 chloroform:methanol to give diSia-Bn monomer **6** (93.8 mg, 0.103 mmol, 61%).

$[\alpha]_D^{21}$  -20.3 (*c* 1.61,  $\text{CHCl}_3$ );  $^1\text{H}$  NMR (400 MHz,  $\text{CD}_3\text{OD}$ )  $\delta$  7.30-7.50 (m, 5H), 5.29 (d, 1H,  $J$  = 12.2 Hz), 5.19 (d, 1H,  $J$  = 12.2 Hz), 5.09 (dt, 1H,  $J$  = 6.8, 13.5 Hz), 4.87 (dd, 1H,  $J$  = 14.2 Hz), 4.63-4.68 (m, 2H), 4.59 (dd, 1H,  $J$  = 4.9, 12.2 Hz), 4.34 (dt, 1H,  $J$  = 5.4, 10.8 Hz), 4.23 (dt, 1H,  $J$  = 5.4, 11.7 Hz), 4.07 (dd, 1H,  $J$  = 7.3, 14.6 Hz), 3.45-3.89 (m, 13H), 3.14 (dd, 2H,  $J$  = 6.8, 7.3 Hz), 2.67 (dd, 1H,  $J_{3,4}$  = 4.9, 12.7 Hz), 2.38 (dd, 1H,  $J_{3,4}$  = 5.4, 13.2 Hz), 2.21 (dd, 2H,  $J$  = 7.4, 7.8 Hz), 1.90-2.15 (m, 8H), 1.55-1.76 (m, 4H), 1.37-1.55 (m, 4H), 1.27-1.35 (m, 6H);  $^{13}\text{C}$  NMR (100 MHz,  $\text{CD}_3\text{OD}$ )  $\delta$  210.9, 176.6, 176.3, 175.8, 170.4, 168.6, 137.7, 135.1, 132.8, 131.2, 130.6, 130.5x2, 130.4x2, (101.5, 98.3, anomeric), 90.7, 75.8, 75.3, 75.2, 73.3, 72.9, 72.5, 70.6, 70.4, 69.5, 69.4, 69.1x2, 66.3, 65.9, 54.6, 54.3, 42.9, 42.6, 41.3, 41.2, 37.2, 31.5, 31.2, 31.1, 29.6, 28.7, 27.8, 27.7, 27.3, 23.7, 23.4; IR (KBr) 3272, 2931, 1742, 1638, 1557, 1456, 1375, 1297, 1182, 1125, 1040, 700, 613 ( $\text{cm}^{-1}$ ); HRMS (ESI-TOF) Calcd. for  $\text{C}_{44}\text{H}_{66}\text{N}_3\text{O}_{17}$   $[\text{M} + \text{H}]^+$  908.4392, found 908.4419.

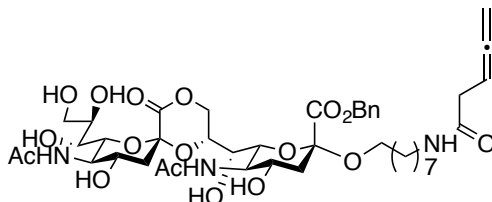

### Polymrization of the lactone monomer 16 to 17a and 17b

Bis(1,5-cyclooctadiene)nickel (0.1 M solution of toluene), 10-azido-3-trifluoroacetyl-1-decene (**14**) (0.1 M solution of toluene) and **Monomer** (1.00 eq.) in **solvent** were placed under a nitrogen atmosphere in a test tube equipped with a three way tap and a magnetic stirrer bar. The mixture was stirred at room temperature for **reaction time**. After complete conversion of the monomer (monitored by TLC analysis), the solution was precipitated with **solvent** and concentrated *in vacuo* to give **Polymer**.

### 20 mer 17a

According to the general procedure 2 with the following amounts: Bis(1,5-cyclooctadiene) nickel (41.2  $\mu$ L, 4.12  $\mu$ mol, 0.0500 eq.), 10-azido-3-trifluoroacetyl-1-decene (**14**) (41.2  $\mu$ L, 4.96  $\mu$ mol, 0.0600 eq.) was added a solution of diSia-Bn monomer (**16**) (75.0 mg, 82.6  $\mu$ mol, 1.00 eq.) in MeOH (500  $\mu$ L) at room temperature for 3 days to give

azido-poly-disia-Bn ester 20 mer **17a** (73.1 mg, 97%).

$^1\text{H}$  NMR (400 MHz,  $\text{CD}_3\text{OD}$ )  $\delta$  7.20-7.45 (m, 5H), 5.10-5.40 (m, 2H), 4.50-4.67 (br-m), 4.20-4.40 (br-m, 1H), 4.00-4.12 (dt, 1H,  $J = 5.4, 11.7$  Hz), 3.40-3.95 (br-m, 11H), 3.00-3.40 (br-m, 4H), 2.47-2.79 (br-m, 2H, H-3eq., H-3'eq.), 1.80-2.46 (br-m, 10H), 1.03-1.80 (br-m, aliphatic).; IR (KBr) 3442, 2095, 1640, 611 ( $\text{cm}^{-1}$ ).

#### 50 mer **17b**

According to the general procedure 2 with the following amounts: Bis(1,5-cyclooctadiene) nickel (13.0  $\mu\text{L}$ , 1.30  $\mu\text{mol}$ , 0.0200 eq.), 10-azido-3-trifluoroacetyl-1-decene (**14**) (13.0  $\mu\text{L}$ , 1.56  $\mu\text{mol}$ , 0.0240 eq.) was added a solution of diSia-Bn monomer **16** (59.0 mg, 65.0  $\mu\text{mol}$ , 1.00 eq.) in MeOH (500  $\mu\text{L}$ ) at room temperature for 3 days to give azido-poly-disia-Bn ester 50 mer **17b** (52.3 mg, 89%).

$^1\text{H}$  NMR (400 MHz,  $\text{CD}_3\text{OD}$ )  $\delta$  7.15-7.42 (m, 5H, aromatic), 5.10-5.40 (m, 2H), 4.45-4.70 (br-m), 4.18-4.40 (br-m, 1H), 4.00-4.15 (br-m, 1H), 3.42-3.97 (br-m, 11H), 3.00-3.40 (br-m, 4H), 2.47-2.79 (br-m, 2H), 1.03-2.46 (br-m, H-3ax., H-3'ax., Acx2,  $\text{NHC(O)CH}_2$ , aliphatic); IR (KBr) 3291, 2108, 1743m 1641, 1559, 1126, 1072, 1038 ( $\text{cm}^{-1}$ ).

#### Hirololysis of the Glycopolymers **17a** and **17b**

##### 20 mer **3a**

To a stirred solution of azido-poly-disia-Bn ester 20 mer **17a** (24.3 mg, 1.34  $\mu\text{mol}$ , 1.00 eq.) in  $\text{H}_2\text{O}$  (500  $\mu\text{L}$ ) and 1,4-dioxane (500  $\mu\text{L}$ ) was added  $\text{LiOH} \cdot \text{H}_2\text{O}$  (0.561 mg, 13.4 mmol, 10.0 eq.) at room temperature. After being stirred at 60  $^\circ\text{C}$  for 1 day, the reaction mixture was evaporated *in vacuo*. The residue was purified with PD-10 to give 20mer **3a** (22.0 mg, quant.). DP and PDI of the purified polymer **17a** were estimated by a size-exclusion chromatography (SEC: TSKgel- $\alpha$ 2500 and TSKgel- $\alpha$ 3000) eluted with 0.1%  $\text{CHOOH}$  in  $\text{H}_2\text{O}$  solution to be 26 and 1.09, respectively.

Mn was determiend relative to a PEG standard samples

$^1\text{H}$  NMR (400 MHz,  $\text{D}_2\text{O}$ )  $\delta$  5.00-5.30 (br-s, 0.7 H), 3.88-4.20 (br-m, 2H, H-8, H-9a), 3.40-3.90 (br-m, 14H, H-4, H-5, H-6, H-7, H-9b, H-4', H-5', H-6', H-7', H-8', H-9'x2,  $\text{OCH}_2\text{x2}$ ), 3.30 (br-s, 1H,  $\text{OCH}_2\text{CH}_2$ ), 2.90-3.10 (br-s, 1H,  $\text{OCH}_2\text{CH}_2$ ), 2.44-2.70 (br-m, H-3eq., H-3'eq.), 1.70-2.20 (br-m, 10H, H-3ax., H-3'ax., Acx2,  $\text{NHC(O)CH}_2$ ), 0.95-1.70 (br-m, aliphatic)

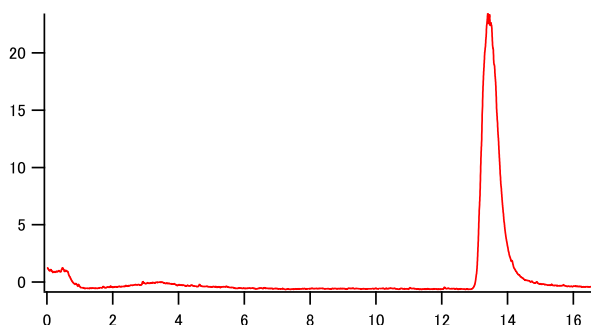

GPC-HPLC chart of **3a**

### 50 mer 3-29c

To a stirred solution of azido-poly-disia-Bn ester 50 mer **17b** (17.3 mg, 0.381  $\mu$ mol, 1.00 eq.) in H<sub>2</sub>O (500  $\mu$ L) and 1,4-dioxane (500  $\mu$ L) was added LiOH  $\cdot$  H<sub>2</sub>O (0.160 mg, 3.81  $\mu$ mol, 10.0 eq.) at room temperature. After being stirred at 60 °C for 1 day, the reaction mixture was evaporated *in vacuo*. The residue was purified with PD-10 to give azido-poly-*N*-5,6-heptadienylcarbonylaminoethyl 5-acetamido-8-*O*-(5-acetamido-3,5-dideoxy-D-glycero- $\alpha$ -D-galacto-2-nonulopyranosylonic acid)-3,5-dideoxy-D-glycero- $\alpha$ -D-galacto-2-nonulopyranosylonic acid 50mer **3b** (16.5 mg, quant.). DP and PDI of the purified polymer **17b** were estimated by a size-exclusion chromatography (SEC: TSKgel- $\alpha$ 2500 and TSKgel- $\alpha$ 3000) eluted with 0.1% CHOOH in H<sub>2</sub>O solution to be 42 and 1.14, respectively. Mn was determined relative to a PEG standard samples

<sup>1</sup>H NMR (400 MHz, D<sub>2</sub>O)  $\delta$  5.00-5.40 (br-s, 0.5 H), 3.90-4.20 (br-m, H-8, H-9a), 3.20-3.90 (br-m, 15H, H-4, H-5, H-6, H-7, H-9b, H-4', H-5', H-6', H-7', H-8', H-9'x2, OCH<sub>2</sub>x2, OCH<sub>2</sub>CH<sub>2</sub>), 3.01 (br-s, OCH<sub>2</sub>CH<sub>2</sub>), 2.40-2.75 (br-m, 2H, H-3eq., H-3'eq.), 1.70-2.30 (br-m, 10H, H-3ax., H-3'ax., Acx2, NHC(O)CH<sub>2</sub>), 0.90-1.70 (br-m, aliphatic).

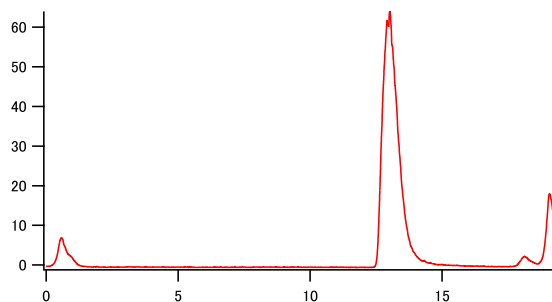

GPC-HPLC chart of **3b**

### Fluorescent labeling of the glycolymer 3

#### 20 mer 1a

To a stirred solution of azido-poly-*N*-5,6-heptadienylcarbonylaminoethyl 5-acetamido-8-*O*-(5-acetamido-3,5-dideoxy-D-glycero- $\alpha$ -D-galacto-2-nonulopyranosylonic acid)-3,5-dideoxy-D-glycero- $\alpha$ -D-galacto-2-nonulopyranosylonic acid 20 mer **3-29b** (10.2 mg, 5.62  $\mu$ mol, 1.00 eq.) and TAMRA-alkyne (0.627 mg, 1.12  $\mu$ mol, 2.00 eq.) in saturated aq. NaHCO<sub>3</sub> (500  $\mu$ L) was added a catalytic amount of 0.5 M aqueous CuSO<sub>4</sub> and 0.5 M aqueous Na ascorbate at room temperature. After being stirred at the same temperature for 1 day, the reaction mixture was evaporated *in vacuo*. The residue was purified with PD-10 to give TAMRA-poly-*N*-5,6-heptadienylcarbonylaminoethyl 5-acetamido-8-*O*-(5-acetamido-3,5-dideoxy-D-glycero- $\alpha$ -D-galacto-2-nonulopyranosylonic acid)-3,5-dideoxy-D-glycero- $\alpha$ -D-galacto-2-nonulopyranosylonic acid 20 mer **3-30b** (10.3 mg, quant.).

<sup>1</sup>H NMR (400 MHz, D<sub>2</sub>O)  $\delta$  8.34 (s, aromatic), 4.90-5.10 (br-s), 3.90-4.10 (br-m, 2H, H-8, H-9a), 2.80-3.83 (br-m, 19H, H-4, H-5, H-6, H-7, H-9b, H-3', H-4', H-5', H-6', H-7', H-8', H-9'x2, OCH<sub>2</sub>, OCH<sub>2</sub>CH<sub>2</sub>, NHCH<sub>2</sub>), 2.40-2.70 (br-m, 2H, H-3eq., H-3'eq.), 0.80-2.20 (br-m, H-3ax., H-3'ax., Acx2, aliphatic); IR (KBr) 3437, 1634, 1361, 1121, 837, 769, 669, 620 (cm<sup>-1</sup>); HRMS

#### 50 mer 1b

To a stirred solution of azido-poly-*N*-5,6-heptadienylcarbonylaminoethyl 5-acetamido-8-*O*-(5-acetamido-3,5-dideoxy-D-glycero- $\alpha$ -D-galacto-2-nonulopyranosylonic acid)-3,5-dideoxy-D-glycero- $\alpha$ -D-galacto-2-

nonulopyranosylonic acid 50 mer **3-29c** (9.7 mg, 0.214  $\mu\text{mol}$ , 1.00 eq.) and TAMRA-alkyne (0.239 mg, 4.27  $\mu\text{mol}$ , 2.00 eq.) in saturated aq.  $\text{NaHCO}_3$  (500  $\mu\text{L}$ ) was added a catalytic amount of 0.5 M aqueous  $\text{CuSO}_4$  and 0.5 M aqueous Na ascorbate at room temperature. After being stirred at the same temperature for 1 day, the reaction mixture was evaporated *in vacuo*. The residue was purified with PD-10 to give TAMRA-poly-*N*-5,6-heptadienylcarbonyl-aminooctyl 5-acetamido-8-*O*-(5-acetamido-3,5-dideoxy-D-glycero- $\alpha$ -D-galacto-2-nonulopyranosylonic acid)-3,5-dideoxy-D-glycero- $\alpha$ -D-galacto-2-nonulopyranosylonic acid 50 mer **3-30c** (10.0 mg, quant.).

$^1\text{H}$  NMR (400 MHz,  $\text{D}_2\text{O}$ )  $\delta$  8.32 (br-s, 0.1 H, aromatic), 3.95-4.10 (br-m, 2H, H-8, H-9a), 3.20-3.90 (br-m, 17H, H-4, H-5, H-6, H-7, H-9b, H-3', H-4', H-5', H-6', H-7', H-8', H-9'x2,  $\text{OCH}_2$ ,  $\text{OCH}_2\text{CH}_2$ ), 2.90-3.10 (br-s, 2H,  $\text{NHCH}_2$ ), 2.63 (br-dd, 1H, H-3eq. or H-3' eq.,  $J_{3,4} = 2.9$  Hz,  $J_{\text{gem}} = 11.2$  Hz), 1.70-2.20 (br-m, 10H, H-3ax., H-3'ax., Acx2,  $\text{NHC(O)CH}_2$ ), 1.00-1.70 (br-m, aliphatic).

### Dissociating effect of the fluorescent-labelled diSia polymers 1a and 1b and the diSia 18 on the Siglec-7-GD3 interaction

Fc chimaera containing the three N-terminal domains of siglec-7 were purified with Protein A-agarose from tissue culture supernatants of stably transfected CHO cells. 96 well plastic plates were incubated with GD3 in ethanol (30 pmol/well) and solution was dried up for incubation at 37°C for 2h. The immobilized GD3 was a target molecule for Siglec7. Prior to the binding assay, the Fc-chimaeras were complexed with an anti-human IgG+M+A antibody coupled to peroxidase (1:1000 dilution) in 0.1% BSA containing PBS (10 mM phosphate buffer, 150 mM NaCl (pH 7.2)) for 30 min at room temperature. A 50 µl aliquot of this mixture was added per well and incubated for 4 h at room temperature. After five washes with PBS containing 0.05% tween-20 (PBST), the diSia polymer (1a and 1b) or diSia (18) containing PBS or PBS was added to the plate and incubated for 1 h at room temperature. After washing with PBST, 100 µl of the substrate solution was added to the well (100 mM Tris-HCl (pH 6.8), 0.05% *o*-phenylenediamine, 0.006% H<sub>2</sub>O<sub>2</sub>) and the reaction was stopped by adding 100µl of 2N H<sub>2</sub>SO<sub>4</sub>. The amount of bound peroxidase was quantified by the measurement of absorbance 490 nm using a microplate reader.

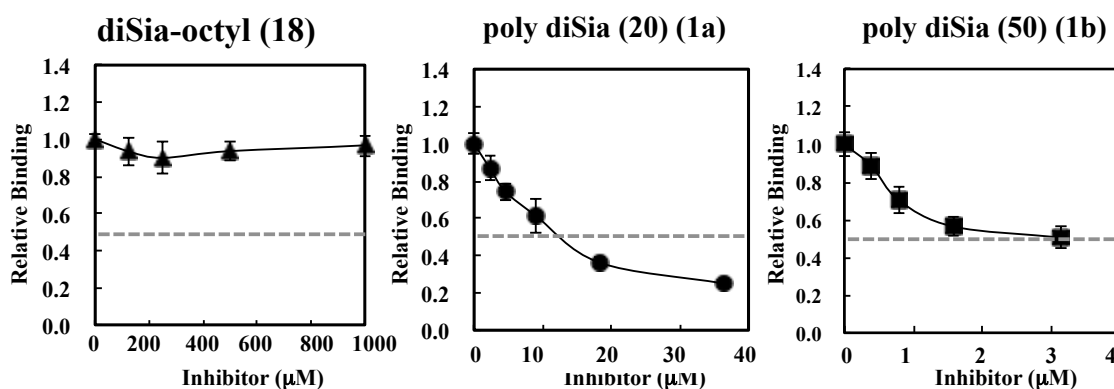

### Supplemental figure. Inhibition of the GD3-Siglec7 interaction in the presence or absence of inhibitors.

The GD3-Siglec7 interaction was measured by the ELISA based method. The absorbance in the absence of inhibitors were set to 1.0. Disia-octyl (18), monoSia-octyl, polydiSia (20) (1a) and polydiSia (50) (1b) were used as inhibitors as indicated concentrations. The concentration that lead to 50% inhibition was defined as IC<sub>50</sub>.



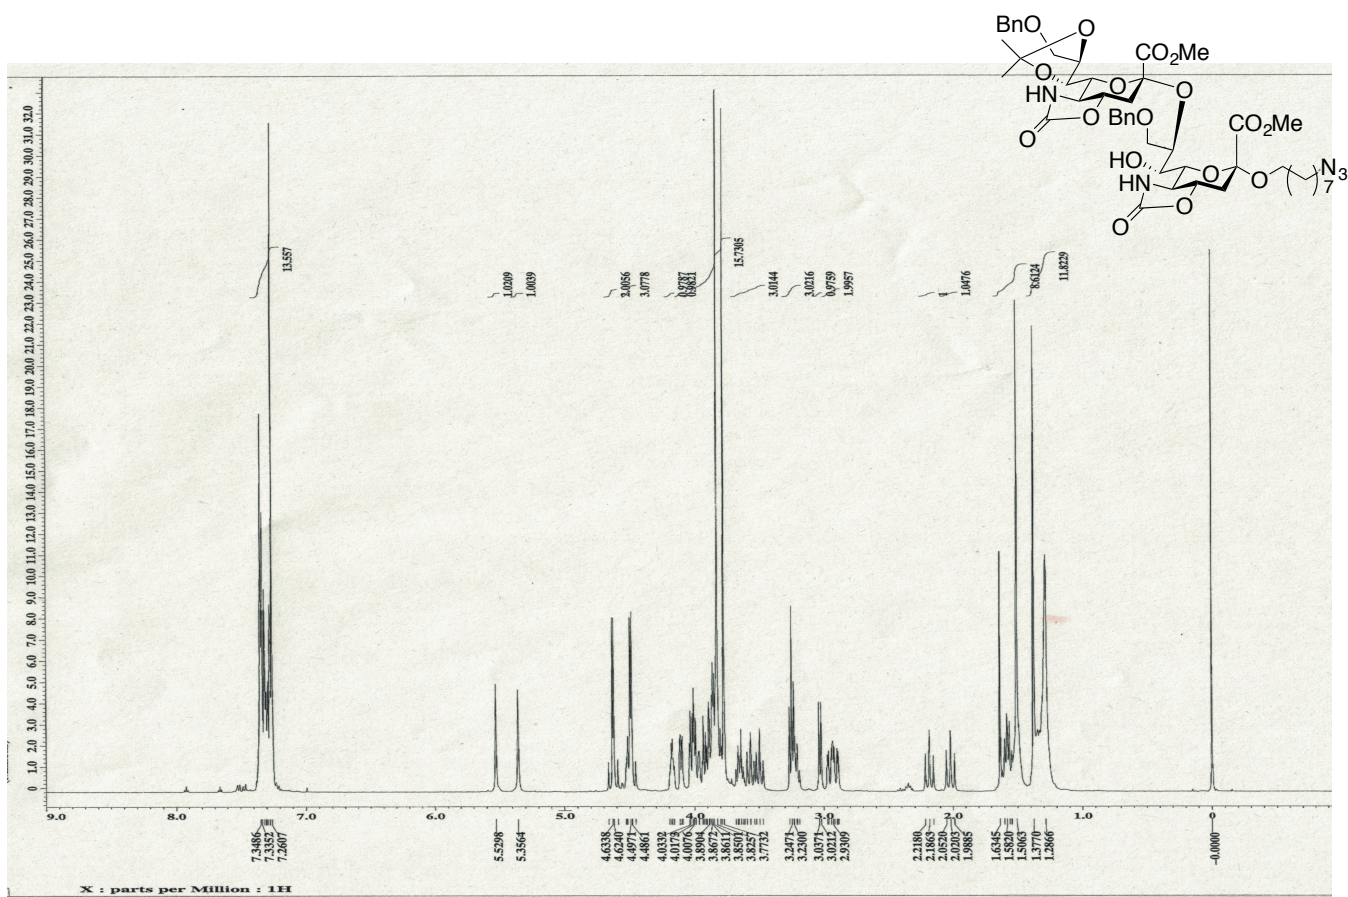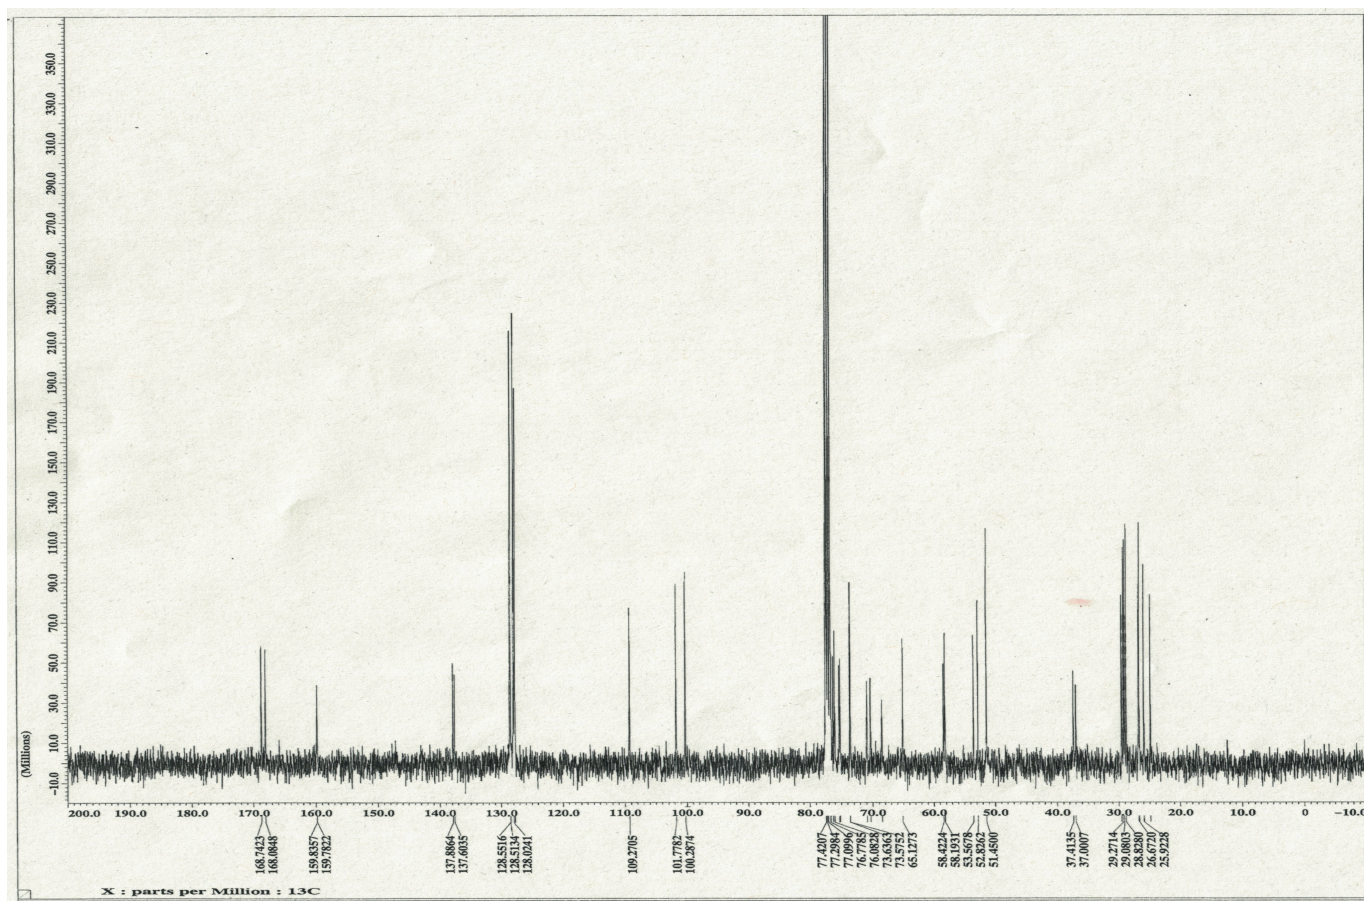



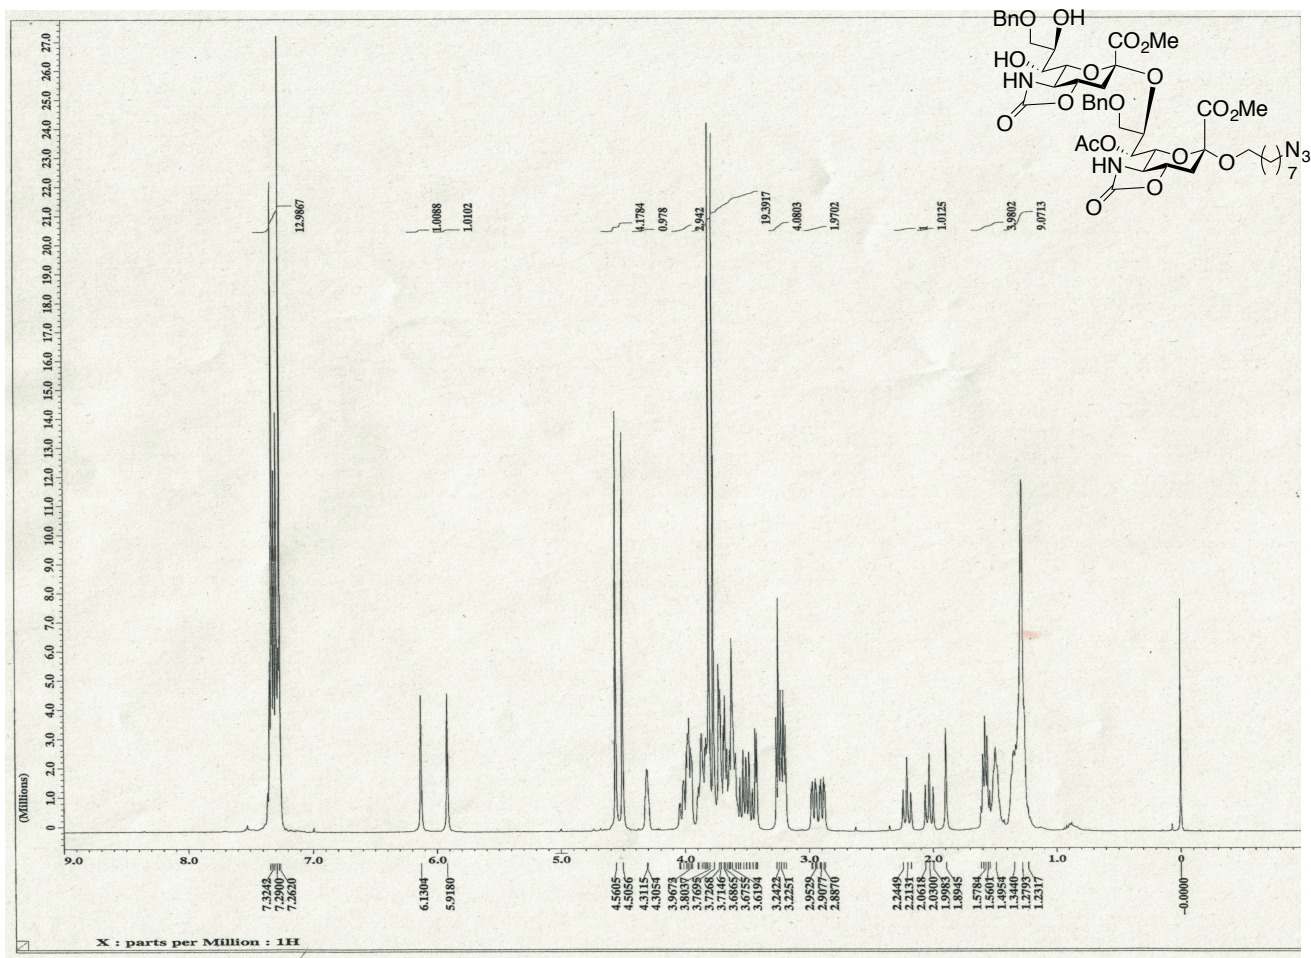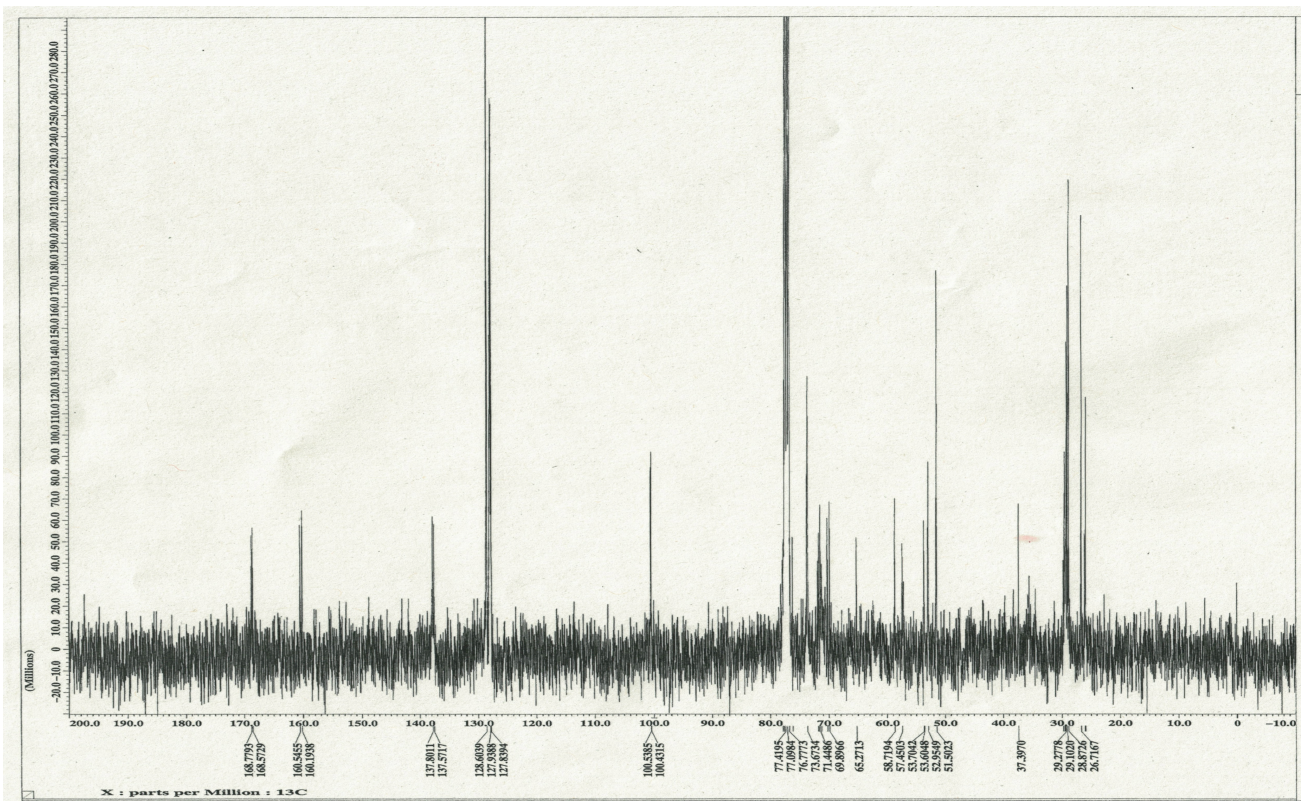



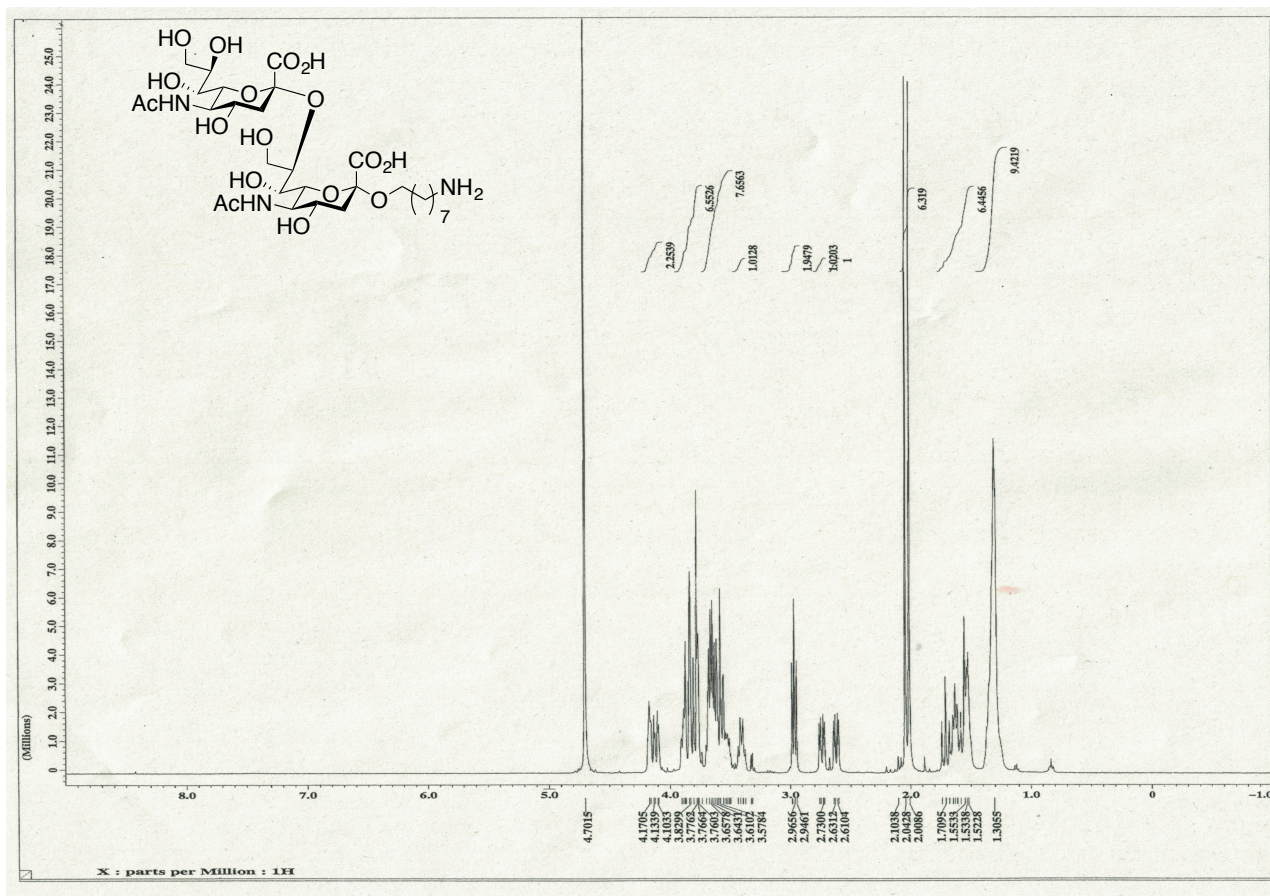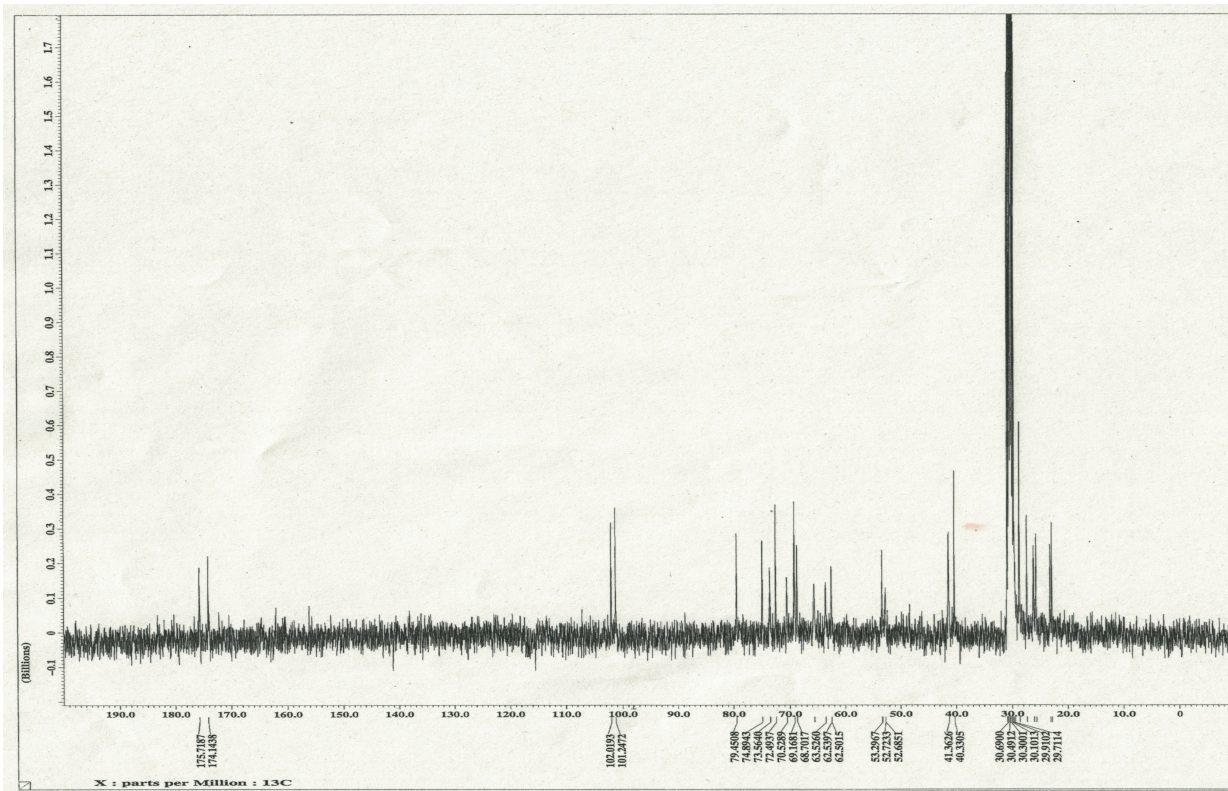



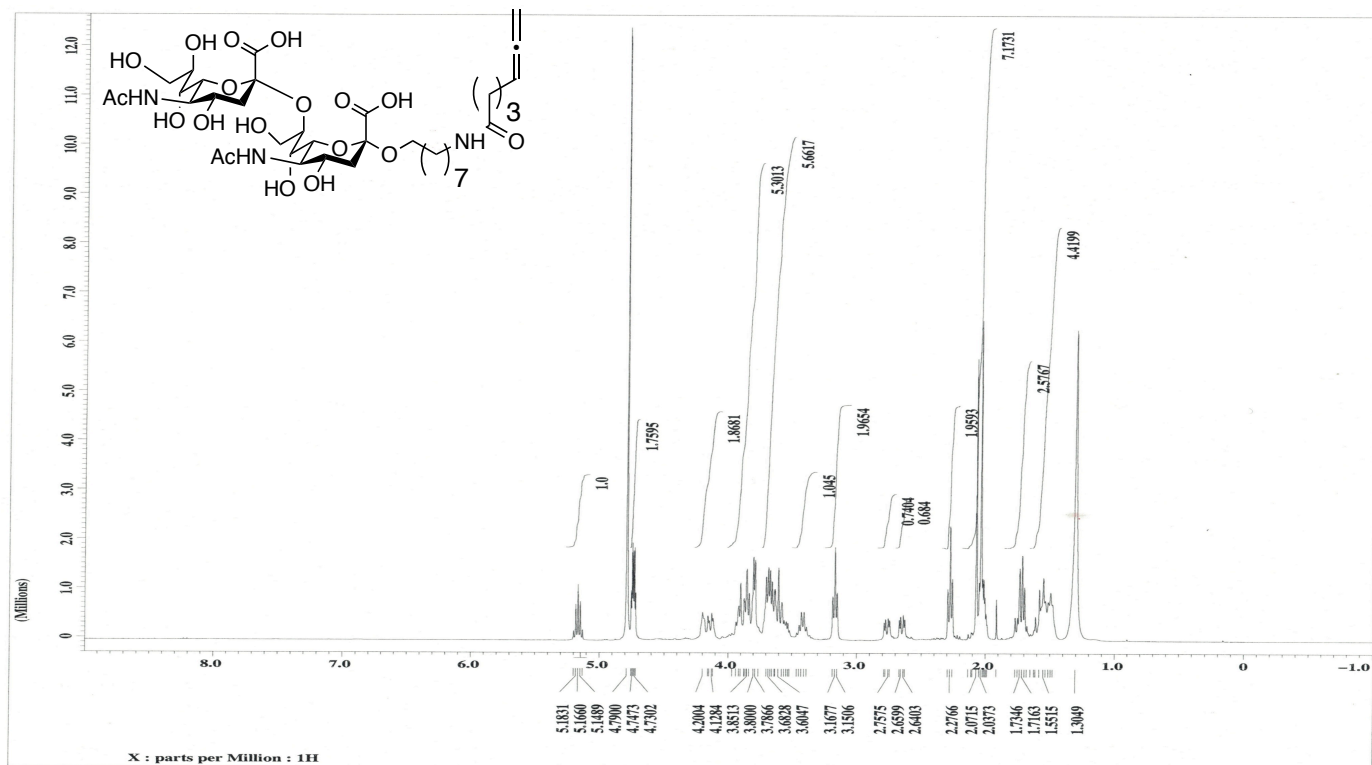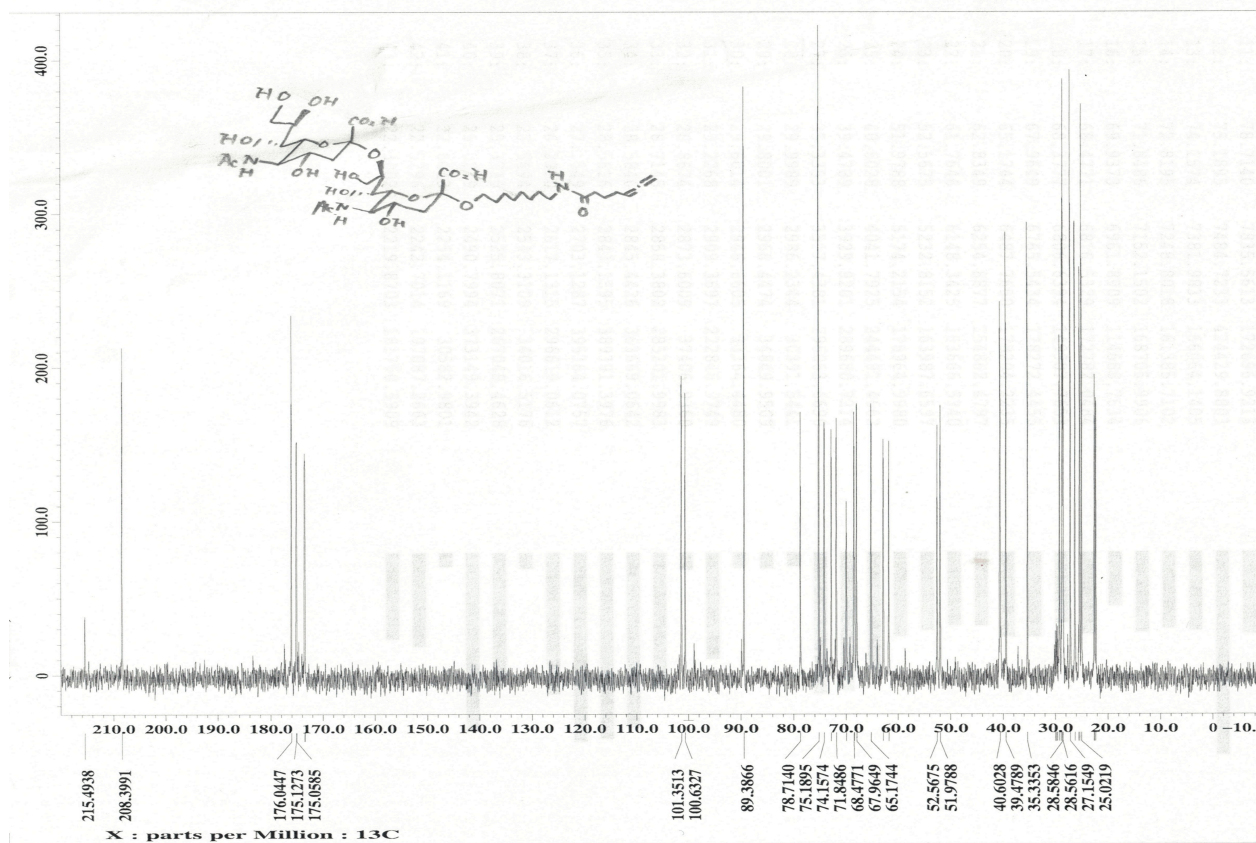

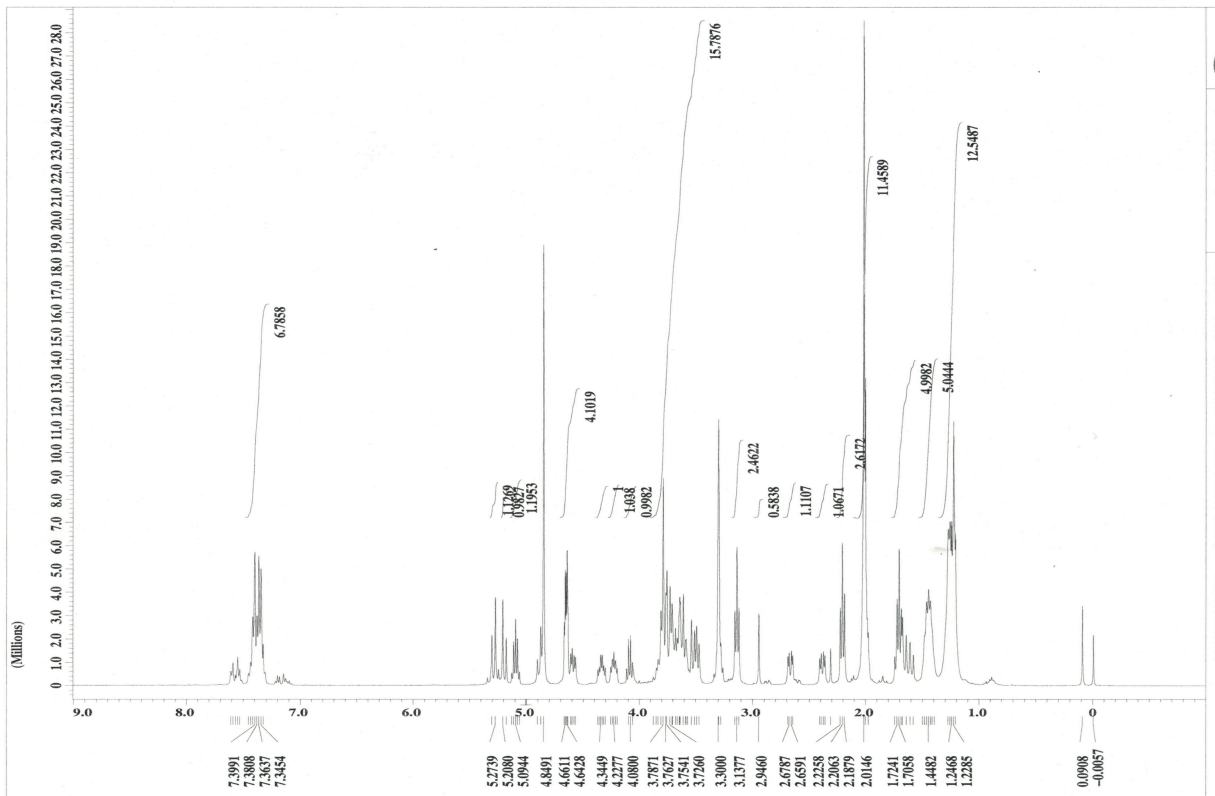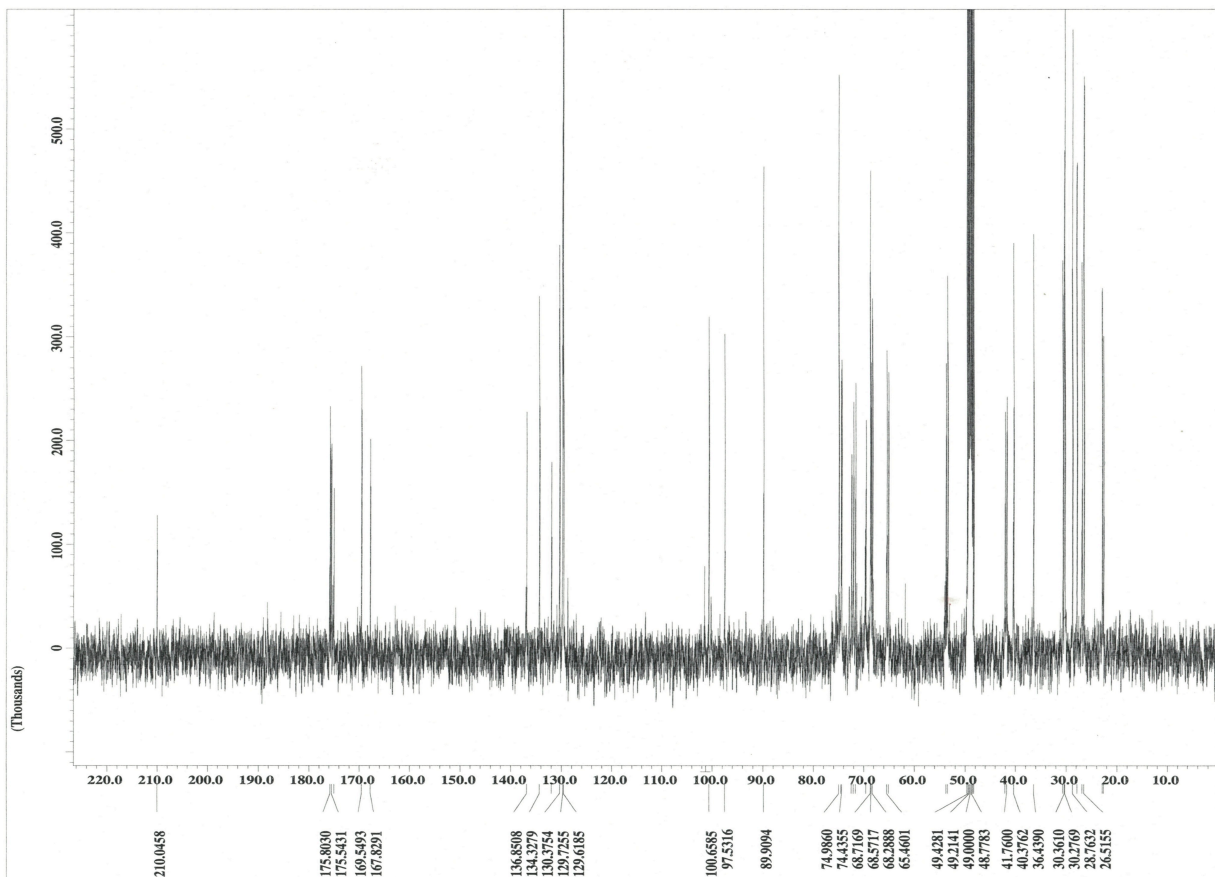

20 mer **3a**

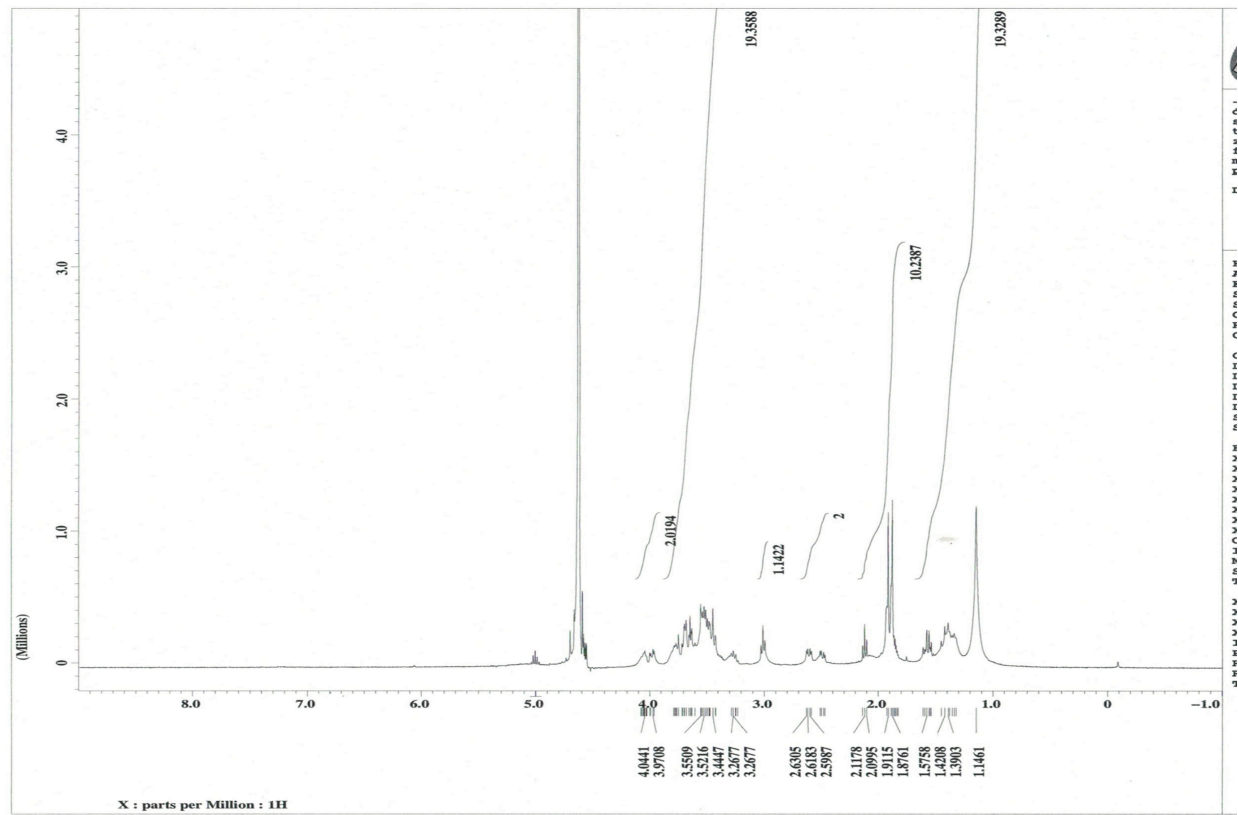

50mer **3b**

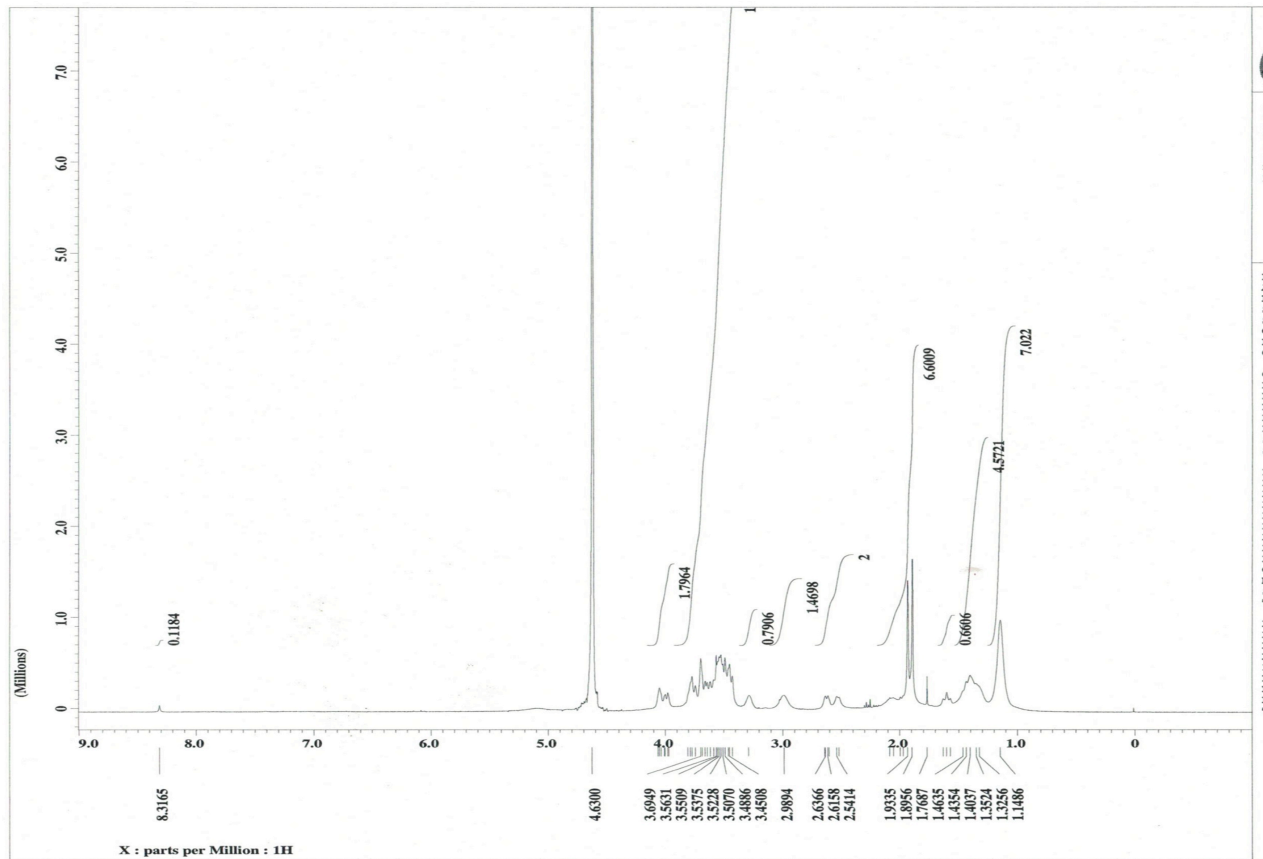

Supplement: c6cc07115e1.pdf [file c6cc07115e1.pdf]
